# Supplementary material for: Self-Reported Restrictive Eating, Eating Disorders, Menstrual Dysfunction, and Injuries in Athletes Competing at Different Levels and Sports
Source: MDPI journal article supplement (doi:10.3390/nu13093275), 2021-09-19
Supplement: s1 [file s1]

## Supplemental material

**Table S1.** List of sports reported by the athletes (number of athletes in parentheses).

| Lean sports (n = 545, 64.4% of the whole sample) | Non-lean sports (n = 301, 35.6% of the whole sample) |
|--------------------------------------------------|------------------------------------------------------|
| Biathlon (1)                                     | Agility (1)                                          |
| Brazilian jiu-jitsu (10)                         | Alpine skiing (2)                                    |
| Cheerleading (43)                                | American football (22)                               |
| Climbing (2)                                     | Badminton (3)                                        |
| Cross-country skiing (42)                        | Bandy (7)                                            |
| Cycling (8)                                      | Basketball (2)                                       |
| Dancing (23)                                     | Beach volley (3)                                     |
| Diving (2)                                       | Crossfit (17)                                        |
| Figure skating (51)                              | Disc golf (14)                                       |
| Fitness (11)                                     | Fencing (1)                                          |
| Gymnastic (21)                                   | Finnish baseball (10)                                |
| Hurdling (3)                                     | Flag football (2)                                    |
| Judo (7)                                         | Floorball (36)                                       |
| Kickboxing (1)                                   | Futsal (2)                                           |
| Middle- and long-distance running (34)           | Handball (6)                                         |
| Mixed martial arts (1)                           | Horseback riding (5)                                 |
| Mushing (2)                                      | Ice hockey (33)                                      |
| Orienteering (30)                                | Motorsport (2)                                       |
| Powerlifting (9)                                 | Ringette (15)                                        |
| Race walking (2)                                 | Roller derby (1)                                     |
| Rowing (4)                                       | Rugby (2)                                            |
| Skating (1)                                      | Sailing (2)                                          |
| Steeplechase (1)                                 | Shooting (1)                                         |
| Street workout (1)                               | Snowboarding (1)                                     |
| Strongman (2)                                    | Soccer (78)                                          |
| Swimming (115)                                   | Speed skating (3)                                    |
| Swimrun (1)                                      | Sprint (3)                                           |
| Synchronized swimming (14)                       | Taido (1)                                            |
| Taekwondo (6)                                    | Tennis (1)                                           |
| Thai boxing (1)                                  | Ultimate (1)                                         |
| Track and field (antigravitation sports) (17)    | Underwater rugby (1)                                 |
| Triathlon (24)                                   | Volleyball (17)                                      |
| Weightlifting (51)                               | Water polo (6)                                       |
| Wrestling (4)                                    |                                                      |

**Table S2.** Characteristics of the participants and comparisons between the athletes classified by their competition level, age, and type of sport.

|                                            | All participants              | Non-elite athletes                 | Elite athletes                     | Younger athletes                      | Older athletes                        | Lean sport athletes                   | Non-lean sport athletes               |
|--------------------------------------------|-------------------------------|------------------------------------|------------------------------------|---------------------------------------|---------------------------------------|---------------------------------------|---------------------------------------|
| Age (years), mean (SD)                     | 24.3 (7.5)<br>(n = 846)       | 27.0 (8.6)<br>(n = 221)            | 23.3 (6.8)<br>(n = 625)            | 19.0 (2.6)<br>(n = 496)               | 31.8 (5.4)<br>(n = 350)               | 24.3 (5.8)<br>(n = 545)               | 24.4 (6.9)<br>(n = 301)               |
| Height (cm), mean (SD)                     | 167.8 (6.5)<br>(n = 846)      | 167.3 (5.9)<br>(n = 221)           | 168.0 (6.6)<br>(n = 625)           | 168.2 (6.5)<br>(n = 496)              | 167.3 (6.4)<br>(n = 350)              | <b>167.4 (6.4)*</b><br>(n = 545)      | <b>168.7 (6.6)*</b><br>(n = 301)      |
| Weight (kg), median (IQR)                  | 64.0 (58–70)<br>(n = 841)     | 64.0 (58–70)<br>(n = 219)          | 64.0 (58–70)<br>(n = 622)          | <b>63.0 (57–68)*</b><br>(n = 491)     | <b>65.0 (59–72)*</b><br>(n = 350)     | <b>63.0 (57–68)*</b><br>(n = 544)     | <b>65.0 (61–73)*</b><br>(n = 297)     |
| BMI (kg/m <sup>2</sup> ), median (IQR)     | 22.6 (20.8–24.3)<br>(n = 841) | 22.8 (21.0–25.1)<br>(n = 219)      | 22.5 (20.8–24.2)<br>(n = 622)      | <b>22.5 (20.7–23.8)*</b><br>(n = 491) | <b>23.2 (21.1–25.6)*</b><br>(n = 350) | <b>22.3 (20.6–24.1)*</b><br>(n = 544) | <b>23.2 (21.6–25.4)*</b><br>(n = 297) |
| % BMI < 18.5kg/m <sup>2</sup>              | 2.6 (22)<br>(n = 841)         | 2.23 (5)<br>(n = 219)              | 2.7 (17)<br>(n = 622)              | 3.1 (15)<br>(n = 491)                 | 2.0 (7)<br>(n = 350)                  | 3.3 (18)<br>(n = 544)                 | 1.3 (4)<br>(n = 297)                  |
| Training hours <sup>a</sup> , median (IQR) | 550 (384–728)<br>(n = 726)    | <b>484 (250–574)*</b><br>(n = 189) | <b>600 (450–786)*</b><br>(n = 537) | <b>624 (436–850)*</b><br>(n = 413)    | <b>467 (300–600)*</b><br>(n = 313)    | 540 (390–730)<br>(n = 484)            | 561 (380–728)<br>(n = 242)            |

<sup>a</sup> During the preceding year.\* Statistically significant difference ( $p < 0.05$ ) compared with the comparison group.

SD = standard deviation; IQR = interquartile range
